# Supplementary material for: Adaptive Hybrid Ensemble Method for Accelerate Adaptation of Concept Drift
Source: Research Square preprint supplement (doi:10.21203/rs.3.rs-3101864/v1), 2023-06-28
Supplement: Supplementary file 1 [file d1aedca9957b4869259d5069.pdf]

## Highlights of the manuscript

- (1) Hybrid ensemble model of local and global base learners is proposed to improve online learning model convergence.
- (2) Base learners are built by extracting key information, which can improve diverse and effective of ensemble.
- (3) This method provides a favorable approach for adaptive model updating after concept drift occurs.
